# Supplementary material for: Toxin production spontaneously becomes regulated by local cell density in evolving bacterial populations
Source: PLOS journal article supplement (doi:10.1371/journal.pcbi.1007333), 2019-08-30

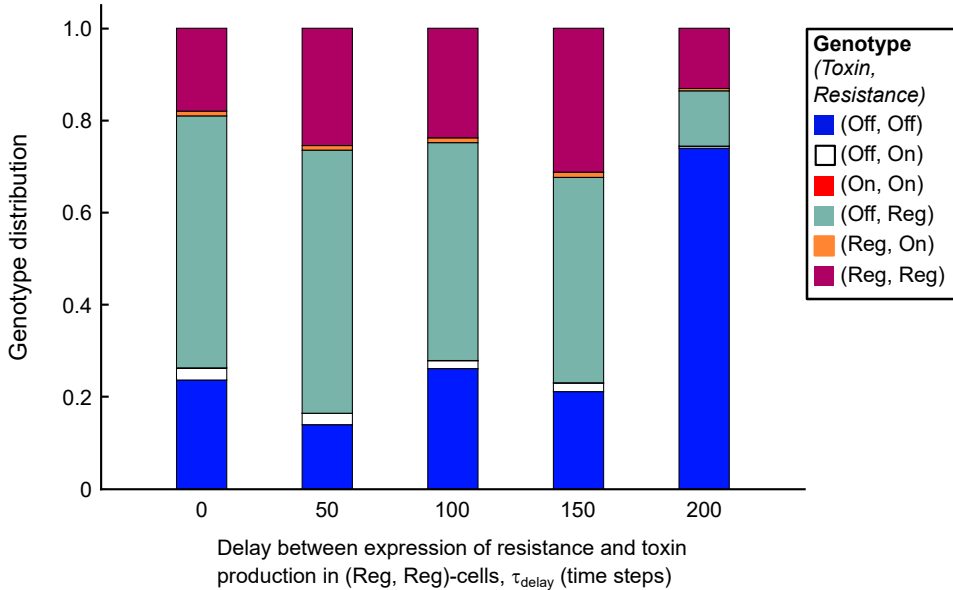

Supplement: S15 (10.1371/journal.pcbi.1007333.s015) [file journal.pcbi.1007333.s015]
